# Supplementary material for: Analyses of Pretherapy Peripheral Immunoscore and Response to Vaccine Therapy
Source: Oxford University Press journal article supplement (doi:10.1158/2326-6066.cir-16-0037), 2016-08-02
Supplement: 23266066cir160037-sup-162291_2_supp_0_ggkjq8.doc [file 23266066cir160037-sup-162291_2_supp_0_ggkjq8.doc]

**“Analyses of Pre-therapy Peripheral Immunoscore and Response to**

**Vaccine Therapy,” by Farsaci et al.**

**SUPPLEMENTARY DATA**

**Materials and Methods**

**Custom software for the calculation of the peripheral immunoscore**

***Description of Vasco software.*** Vasco is a web application that supports the exploration and analysis of various immune cell types in the context of clinical studies through the application of exhaustive expansion. In this study, we recorded data for pre-determined sets of specific phenotypes and ratios at baseline. Hereafter, all such measurements are called analytes. Per each arm, the Spearman’s correlation coefficient and the associated *P* value of each analyte of the pre-treatment samples vs. Progression-free survivals were measured and graphed.When these correlation graphs are displayed, the software provides the ability to filter them based on actual marker combinations and on *P* values.Thesoftware also provides the ability to define a peripheral immunoscore criterion as a set of analytes.In addition, it automatically derives bin assignments, immunoscores, hazard ratio graphs, and Kaplan-Meier graphs, as detailed below.Furthermore, the software can display the R code that derives the statistics and generates the graphs on a separate tab.

***Binning strategy.*** For each individual analyte, Vasco applies a binning strategy such that each unique value is placed into one of three bins, called Low, Medium, and High, where all Low-bin values are less than all Medium-bin values, which are in turn less than all High-bin values. The binning strategy selects exactly one of tertile binning or absolute deviation (AD)binning to apply to each analyte’s value, based on a comparison of both algorithms’ results for that data. At a high level, the selection criterion minimizes the number of non-empty bins while maximizing the separation between adjacent bins. If one algorithm yields more nonempty bins than the other, then the algorithm yielding more nonempty bins is applied; otherwise, if the AD binning relative separation is defined and the tertile relative separation is either undefined or less than the AD relative separation, then AD binning is applied; otherwise, tertile binning is applied.Additional details on the algorithms and terms follows.

***Tertile binning.*** Tertile binning is a 3-binning algorithm in which the bin assignment rule is the following: first, find the R-6 3-quantiles *t1* and *t2* (see http://en.wikipedia.org/wiki/Quantile) of the sequence *x1*, …, *xN*; then assign all values less than *t1* to B1 (Low), assign all values greater than or equal to *t1* and less than *t2* to B2 (Medium), and assign all values greater than or equal to *t2* to B3 (High).

***Absolute deviation binning.*** Absolute deviation binning is a 3-binning algorithm in which the bin assignment rule is the following: assign values to B1 (Low), B2 (Medium), and B3 (High) in such a way that the sum of the absolute deviation of the data in each bin from the bin median is a minimum, given the additional constraint that the number of values in each bin must be within max (10%, 2) of the number of values in the corresponding bin derived from tertile binning.

***Relative separation.*** The relative separation is the separation between bins divided by the range of data, where the separation is the sum of the distances between the bins (for a set of bins B1, …, B*k*, the sum over all adjacent pairs of nonempty bins B*b*, B*b+1* of the minimum value of B*b+1* minus the maximum value of B*b*). If there are no adjacent pairs of nonempty bins, the separation is undefined. If the separation is undefined or the range is zero, the relative separation is undefined.
